# Supplementary material for: Neighborhood social cohesion and serious psychological distress among Asian, Black, Hispanic/Latinx, and White adults in the United States: a cross-sectional study
Source: PubMed Central journal article supplement (PMC9199195; doi:10.1186/s12889-022-13572-4), 2022-06-15

### Supplemental Figure 1. Composition of Analytic Sample

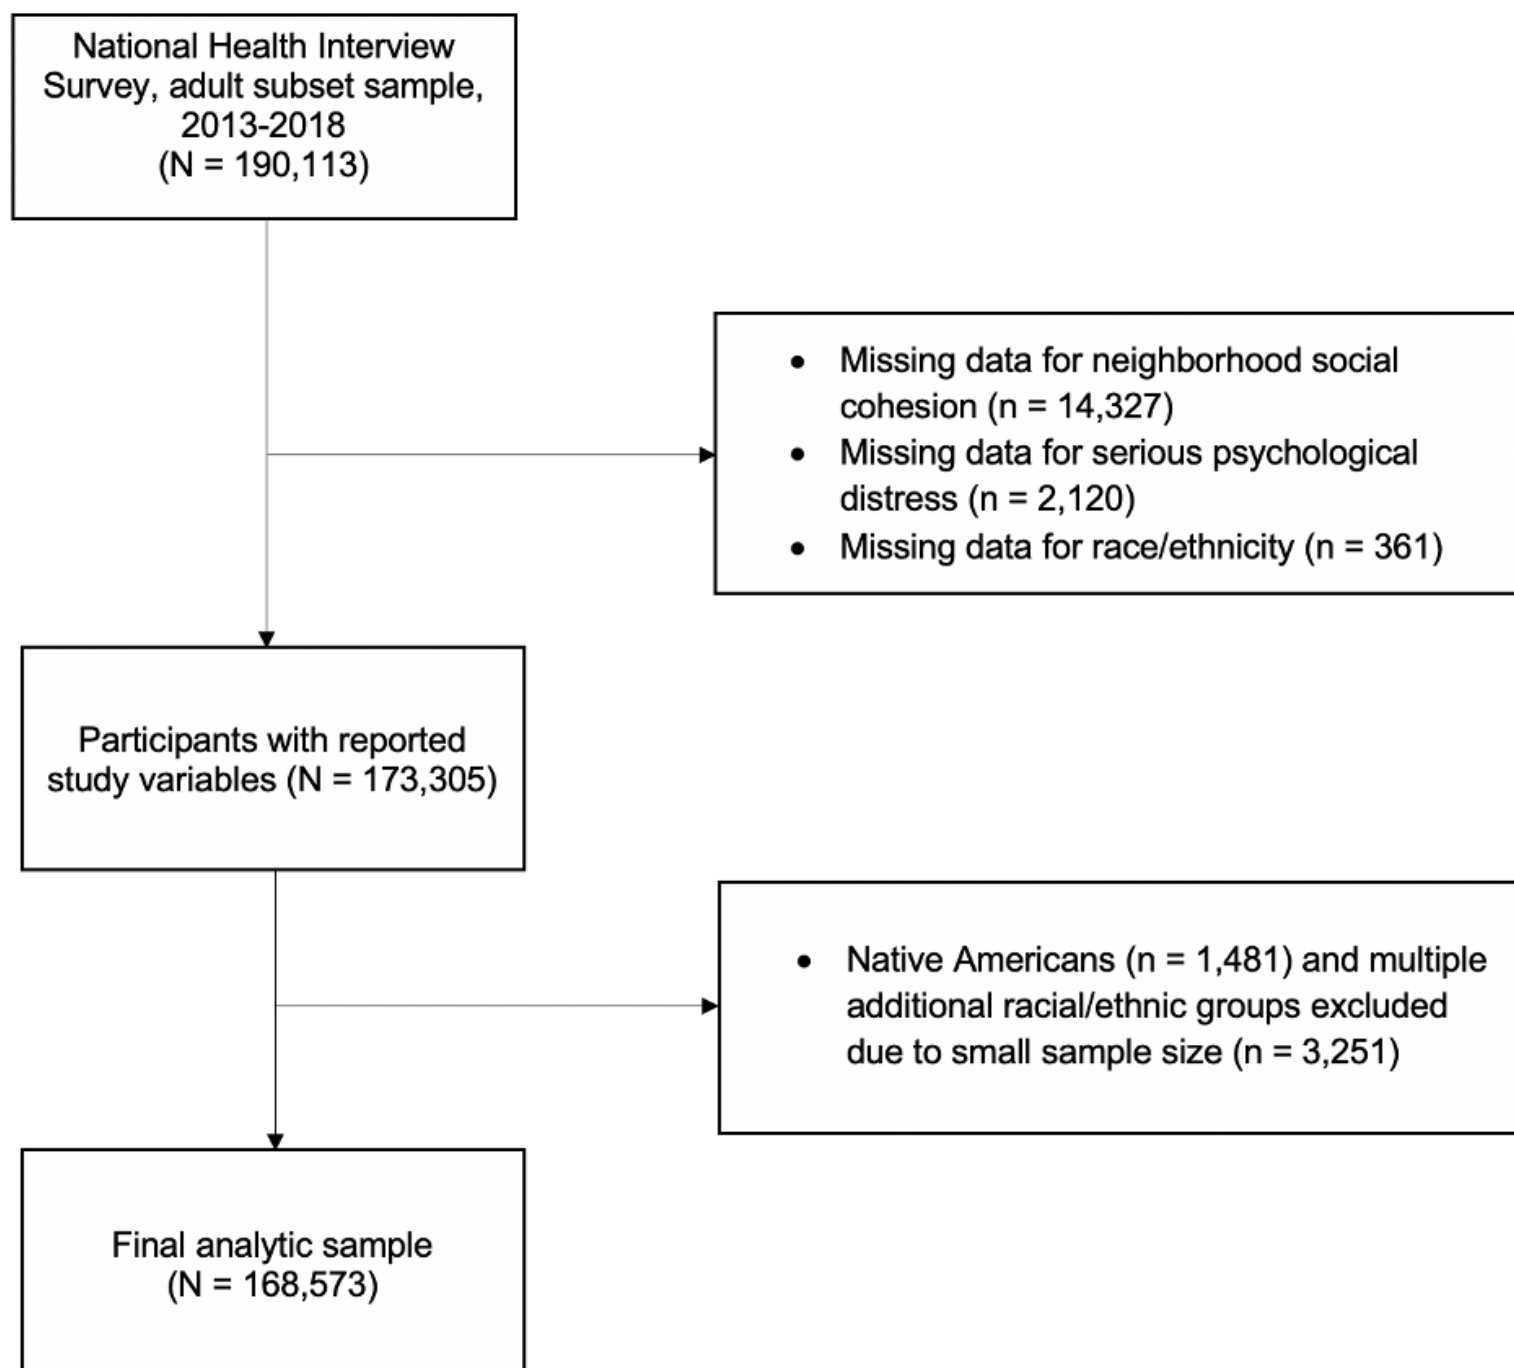

Supplement: 12889_2022_13572_MOESM1_ESM.pdf [file 12889_2022_13572_MOESM1_ESM.pdf]
