# Supplementary material for: Neighborhood social cohesion and serious psychological distress among Asian, Black, Hispanic/Latinx, and White adults in the United States: a cross-sectional study
Source: PubMed Central journal article supplement (PMC9199195; doi:10.1186/s12889-022-13572-4), 2022-06-15
Supplement: 12889_2022_13572_MOESM2_ESM.pdf [file 12889_2022_13572_MOESM2_ESM.pdf]

**Supplemental Table 1. Age-standardized Sociodemographic Characteristics across components of the Neighborhood Social Cohesion Scale (N=168,573)**

|                 | <b>Neighborhood Social Cohesion</b>                    |                                                             |                                                   |                                          |
|-----------------|--------------------------------------------------------|-------------------------------------------------------------|---------------------------------------------------|------------------------------------------|
|                 | <b>People in this neighborhood help each other out</b> | <b>There are people I can count on in this neighborhood</b> | <b>People in this neighborhood can be trusted</b> | <b>This is a close-knit neighborhood</b> |
| All             | 69158 (41.0%)                                          | 85426 (50.7%)                                               | 79128 (46.9%)                                     | 49875 (29.6%)                            |
| SPD             | 29.9%                                                  | 37.6%                                                       | 31.8%                                             | 22.6%                                    |
| Race/ethnicity  |                                                        |                                                             |                                                   |                                          |
| Asian           | 38.8%                                                  | 43.1%                                                       | 43.2%                                             | 28.5%                                    |
| NH-Black        | 32.1%                                                  | 38.4%                                                       | 30.6%                                             | 26.4%                                    |
| Hispanic/Latinx | 30.9%                                                  | 38.6%                                                       | 34.9%                                             | 24.9%                                    |
| NH-White        | 45.5%                                                  | 57.1%                                                       | 54.5%                                             | 31.6%                                    |
| Sex/gender      |                                                        |                                                             |                                                   |                                          |
| Women           | 42.3%                                                  | 52.3%                                                       | 48.7%                                             | 30.3%                                    |
| Age             |                                                        |                                                             |                                                   |                                          |
| 18-30 years     | 30.7%                                                  | 39.4%                                                       | 35.8%                                             | 22.6%                                    |
| 31-49 years     | 38.9%                                                  | 47.7%                                                       | 43.9%                                             | 28.3%                                    |
| ≥50 years       | 45.5%                                                  | 56.4%                                                       | 53.7%                                             | 32.3%                                    |

Note. All estimates are weighted for the survey's complex sampling design. All estimates are age-standardized to the U.S. 2010 population, except for age.

SPD=Serious Psychological Distress
