# Supplementary material for: Neighborhood social cohesion and serious psychological distress among Asian, Black, Hispanic/Latinx, and White adults in the United States: a cross-sectional study
Source: PubMed Central journal article supplement (PMC9199195; doi:10.1186/s12889-022-13572-4), 2022-06-15
Supplement: 12889_2022_13572_MOESM3_ESM.pdf [file 12889_2022_13572_MOESM3_ESM.pdf]

**Supplemental Table 2. Prevalence Ratios of PD and SPD by nSC, Overall and Stratified by Race/Ethnicity, Sex/Gender (N=168573)**

| Neighborhood Social Cohesion | PR (95% CI)                |                            |                            |                             |                            |                            |                            |                            |                            |                            |
|------------------------------|----------------------------|----------------------------|----------------------------|-----------------------------|----------------------------|----------------------------|----------------------------|----------------------------|----------------------------|----------------------------|
|                              | Overall<br>N=168573        |                            | Asian<br>N=9002            |                             | NH-Black<br>N=20763        |                            | Hispanic/Latinx<br>N=25235 |                            | NH-White<br>N=113573       |                            |
|                              | PD <sup>a</sup>            | SPD <sup>b</sup>           | PD                         | SPD                         | PD                         | SPD                        | PD                         | SPD                        | PD                         | SPD                        |
|                              | <b>All<br/>n=168573</b>    |                            |                            |                             |                            |                            |                            |                            |                            |                            |
| Low vs. High                 | <b>1.54</b><br>(1.48-1.60) | <b>1.91</b><br>(1.75-2.10) | <b>1.72</b><br>(1.43-2.06) | 1.40<br>(0.71-2.78)         | <b>1.47</b><br>(1.30-1.66) | <b>1.55</b><br>(1.22-1.97) | <b>1.42</b><br>(1.27-1.58) | <b>1.85</b><br>(1.43-2.41) | <b>1.55</b><br>(1.48-1.63) | <b>1.96</b><br>(1.76-2.18) |
| Medium vs. High              | <b>1.31</b><br>(1.26-1.36) | <b>1.18</b><br>(1.06-1.30) | <b>1.39</b><br>(1.15-1.68) | 1.36<br>(0.73-2.54)         | <b>1.25</b><br>(1.10-1.42) | 1.05<br>(0.81-1.35)        | <b>1.25</b><br>(1.11-1.40) | 0.97<br>(0.74-1.28)        | <b>1.31</b><br>(1.26-1.37) | <b>1.26</b><br>(1.09-1.38) |
|                              | <b>Men<br/>n=76051</b>     |                            |                            |                             |                            |                            |                            |                            |                            |                            |
| Low vs. High                 | <b>1.49</b><br>(1.40-1.59) | <b>2.01</b><br>(1.73-2.33) | <b>1.70</b><br>(1.29-2.24) | <b>4.88</b><br>(1.93-12.33) | <b>1.56</b><br>(1.28-1.92) | <b>1.65</b><br>(1.09-2.49) | <b>1.33</b><br>(1.11-1.60) | <b>1.71</b><br>(1.12-2.62) | <b>1.50</b><br>(1.40-1.62) | <b>2.03</b><br>(1.71-2.43) |
| Medium vs. High              | <b>1.32</b><br>(1.25-1.41) | <b>1.21</b><br>(1.02-1.43) | <b>1.72</b><br>(1.28-2.30) | <b>3.81</b><br>(1.46-10.00) | <b>1.36</b><br>(1.11-1.65) | 1.27<br>(0.84-1.93)        | <b>1.24</b><br>(1.05-1.47) | 0.81<br>(0.50-1.32)        | <b>1.31</b><br>(1.22-1.41) | <b>1.26</b><br>(1.02-1.55) |
|                              | <b>Women<br/>n=92522</b>   |                            |                            |                             |                            |                            |                            |                            |                            |                            |
| Low vs. High                 | <b>1.57</b><br>(1.50-1.66) | <b>1.87</b><br>(1.67-2.10) | <b>1.74</b><br>(1.35-2.26) | 0.73<br>(0.31-1.73)         | <b>1.41</b><br>(1.22-1.63) | <b>1.50</b><br>(1.11-2.04) | <b>1.47</b><br>(1.29-1.69) | <b>2.00</b><br>(1.47-2.71) | <b>1.59</b><br>(1.50-1.68) | <b>1.93</b><br>(1.69-2.19) |
| Medium vs. High              | <b>1.29</b><br>(1.23-1.35) | <b>1.16</b><br>(1.03-1.30) | 1.17<br>(0.90-1.52)        | 0.84<br>(0.39-1.80)         | <b>1.18</b><br>(1.01-1.39) | 0.95<br>(0.68-1.34)        | <b>1.24</b><br>(1.06-1.45) | 1.15<br>(0.86-1.55)        | <b>1.31</b><br>(1.24-1.39) | <b>1.21</b><br>(1.05-1.39) |

<sup>a</sup>PD (Psychological Distress) is Kessler 6-item Distress of 5-12

<sup>b</sup>SPD (Serious Psychological Distress) is Kessler 6-item Distress of 13-24

\*Ref group is Kessler 6-item Distress of 0-4

PR=Prevalence Ratio; CI=Confidence Interval;

Adjusted for age (18-30, 31-49, ≥50 years), educational attainment (<high school, high school graduate, some college, ≥college), annual household income (<\$35,000, \$35,000-\$74,999, \$75,000+), occupational class (professional/management, support services, laborers), region of residence (Northeast, Midwest, South, West), alcohol consumption (never, former, current), "ideal" cardiovascular health (never smoking/quit >12 months prior to interview, BMI 18.5-<25 kg/m<sup>2</sup>, meeting physical activity guidelines, and no prior diagnosis of dyslipidemia, hypertension, or diabetes/prediabetes), marital/co-habiting status (married/living with partner or cohabitating, divorced/widowed/separated, single/no live-in partner), employment status (unemployed, employed), and self-rated health status (excellent/very good, good, fair/poor). All model additionally adjusted for sex (woman, man).

Overall models adjusted for race/ethnicity

Note. All estimates are weighted for the survey's complex sampling design. Boldface indicates statistically significant results at the 0.05 level.
