# Supplementary material for: Neighborhood social cohesion and serious psychological distress among Asian, Black, Hispanic/Latinx, and White adults in the United States: a cross-sectional study
Source: Springer Nature journal article supplement (doi:10.1186/s12889-022-13572-4), 2022-06-15
Supplement: MOESM4 [file 23165194]

**Supplemental Table 3. Prevalence Ratios of PD and SPD: Racial Minoritized Participants vs. NH-Whites with High nSC (N=168573)**

| Neighborhood Social Cohesion | PR (95% CI)                |                            |                            |                            |                            |                            |
|------------------------------|----------------------------|----------------------------|----------------------------|----------------------------|----------------------------|----------------------------|
|                              | Asian<br>N=9002            |                            | NH-Black<br>N=20763        |                            | Hispanic/Latinx<br>N=25235 |                            |
|                              | PD                         | SPD                        | PD <sup>a</sup>            | SPD <sup>b</sup>           | PD                         | SPD                        |
|                              | <b>All<br/>n=168573</b>    |                            |                            |                            |                            |                            |
| Low vs. NH-White High        | <b>1.34</b><br>(1.19-1.51) | 1.02<br>(0.71-1.48)        | <b>1.13</b><br>(1.05-1.23) | 0.96<br>(0.80-1.15)        | <b>1.15</b><br>(1.07-1.25) | <b>1.55</b><br>(1.30-1.84) |
| Medium vs. NH-White High     | 1.12<br>(0.98-1.28)        | 0.96<br>(0.66-1.40)        | 1.00<br>(0.91-1.09)        | <b>0.68</b><br>(0.54-0.84) | 1.02<br>(0.93-1.11)        | <b>0.74</b><br>(0.59-0.93) |
| High vs. NH-White High       | <b>0.85</b><br>(0.72-0.99) | 0.74<br>(0.43-1.25)        | <b>0.80</b><br>(0.71-0.90) | <b>0.62</b><br>(0.49-0.79) | <b>0.83</b><br>(0.74-0.93) | 0.85<br>(0.65-1.12)        |
|                              | <b>Men<br/>n=76051</b>     |                            |                            |                            |                            |                            |
| Low vs. NH-White High        | <b>1.25</b><br>(1.05-1.49) | 1.72<br>(0.96-3.06)        | <b>1.20</b><br>(1.06-1.36) | 1.08<br>(0.82-1.43)        | 1.12<br>(0.98-1.27)        | <b>1.79</b><br>(1.37-2.33) |
| Medium vs. NH-White High     | <b>1.31</b><br>(1.08-1.58) | 1.41<br>(0.84-2.35)        | 1.06<br>(0.93-1.21)        | 0.88<br>(0.64-1.21)        | 1.06<br>(0.92-1.21)        | 0.76<br>(0.52-1.12)        |
| High vs. NH-White High       | 0.80<br>(0.62-1.04)        | <b>0.39</b><br>(0.17-0.87) | <b>0.81</b><br>(0.67-0.98) | <b>0.66</b><br>(0.45-0.98) | 0.87<br>(0.73-1.04)        | 1.03<br>(0.63-1.70)        |
|                              | <b>Women<br/>n=92522</b>   |                            |                            |                            |                            |                            |
| Low vs. NH-White High        | <b>1.39</b><br>(1.19-1.62) | 0.75<br>(0.46-1.21)        | <b>1.10</b><br>(1.00-1.21) | 0.92<br>(0.73-1.15)        | <b>1.18</b><br>(1.07-1.30) | <b>1.44</b><br>(1.14-1.80) |
| Medium vs. NH-White High     | 0.96<br>(0.80-1.15)        | 0.74<br>(0.41-1.33)        | 0.95<br>(0.85-1.07)        | <b>0.58</b><br>(0.43-0.78) | 1.00<br>(0.90-1.12)        | <b>0.74</b><br>(0.56-0.97) |
| High vs. NH-White High       | 0.88<br>(0.71-1.09)        | 0.90<br>(0.49-1.65)        | <b>0.80</b><br>(0.69-0.92) | <b>0.63</b><br>(0.48-0.84) | <b>0.80</b><br>(0.70-0.93) | 0.74<br>(0.55-1.00)        |

<sup>a</sup>PD (Psychological Distress) is Kessler 6-item Distress of 5-12

<sup>b</sup>SPD (Serious Psychological Distress) is Kessler 6-item Distress of 13-24

\*Ref group is Kessler 6-item Distress of 0-4

PR=Prevalence Ratio; CI=Confidence Interval;

Adjusted for age (18-30, 31-49, ≥50 years), educational attainment (<high school, high school graduate, some college, ≥college), annual household income (<\$35,000, \$35,000-\$74,999, \$75,000+), occupational class (professional/management, support services, laborers), region of residence (Northeast, Midwest, South, West), alcohol consumption (never, former, current), "ideal" cardiovascular health (never smoking/quit >12 months prior to interview, BMI 18.5-<25 kg/m<sup>2</sup>, meeting physical activity guidelines, and no prior diagnosis of dyslipidemia, hypertension, or diabetes/prediabetes), marital/co-habiting status (married/living with partner or cohabitating, divorced/widowed/separated, single/no live-in partner), employment status (unemployed, employed), and self-rated health status (excellent/very good, good, fair/poor).

All model additionally adjusted for sex (woman, man).
